# Supplementary material for: Investigation of Genetic Alterations Associated With Interval Breast Cancer
Source: PubMed Central journal article supplement (PMC10811589; doi:10.1001/jamaoncol.2023.6287), 2024-01-25
Supplement: jamaoncol-e236287-s001.pdf [file jamaoncol-e236287-s001.pdf]

## Supplemental Online Content

Rodriguez J, Grassmann F, Xiao Q, et al. Investigation of genetic alterations associated with interval breast cancer. *JAMA Oncol*. Published online January 25, 2023.  
doi:10.1001/jamaoncol.2023.6287

**eTable 1.** Baseline characteristics of BC patients, stratified by study cohort

**eTable 2.** Frequency of germline protein-truncating variants in the 34 BC genes

**eTable 3.** Association of protein-truncating variants in the 5 major genes with interval cancer among women without strong family history of BC

**eTable 4.** Tumor characteristics of BC patients, stratified by mode of detection

**eTable 5.** Association of protein-truncating variants in the 5 major genes with interval cancer

**eFigure 1.** CONSORT flow diagram

**eFigure 2.** Frequency of Protein-Truncating Variants among BC patients

This supplemental material has been provided by the authors to give readers additional information about their work.

**eTable 1. Baseline characteristics of BC patients, stratified by study cohort**

| Baseline characteristics                         | pKARMA<br><i>n</i> = 2,471 | KARMA<br><i>n</i> = 1,650 | pKARMA + KARMA<br><i>n</i> = 4,121 |
|--------------------------------------------------|----------------------------|---------------------------|------------------------------------|
| Age at diagnosis in years, mean (SD)             | 59.4 (6.0)                 | 59.6 (8.4)                | 59.5 (7.1)                         |
| Age at study entry in years, mean (SD)           | 59.4 (6.0)                 | 60.6 (8.6)                | 59.9 (7.2)                         |
| Age at menarche in years, mean (SD)              | 13.2 (1.5)                 | 13.2 (1.5)                | 13.2 (1.5)                         |
| Percent mammographic density (PD), mean (SD)     | 22 (13.3)                  | 23.5 (18.7)               | 22.5 (15.5)                        |
| Body mass index in kg/m <sup>2</sup> , mean (SD) | 25.4 (4.1)                 | 25.9 (4.3)                | 25.6 (4.2)                         |
| Menopausal status at diagnosis, <i>n</i> (%)     |                            |                           |                                    |
| Premenopausal                                    | 232 (9.4)                  | 261 (15.8)                | 493 (12.0)                         |
| Postmenopausal                                   | 2,239 (90.6)               | 1,389 (84.2)              | 3,628 (88.0)                       |
| Missing                                          | 0 (0)                      | 0 (0)                     | 0 (0)                              |
| Education, <i>n</i> (%)                          |                            |                           |                                    |
| Elementary                                       | 378 (15.3)                 | 226 (13.7)                | 604 (14.7)                         |
| Intermediate                                     | 546 (22.1)                 | 545 (33.0)                | 1,091 (26.5)                       |
| University                                       | 1,043 (42.2)               | 726 (44.0)                | 1,769 (42.9)                       |
| Other/missing                                    | 504 (20.4)                 | 153 (9.3)                 | 657 (15.9)                         |
| Number of children, <i>n</i> (%)                 |                            |                           |                                    |
| 0                                                | 402 (16.3)                 | 184 (11.2)                | 586 (14.2)                         |
| 1                                                | 441 (17.9)                 | 245 (14.8)                | 686 (16.6)                         |
| 2                                                | 1,083 (43.8)               | 770 (46.7)                | 1,853 (45.0)                       |
| ≥3                                               | 534 (21.6)                 | 367 (22.2)                | 901 (21.9)                         |
| Missing                                          | 11 (0.4)                   | 84 (5.1)                  | 95 (2.3)                           |

Baseline characteristics of all BC patients from pKARMA, KARMA, and both cohorts combined. NOTE: Significant associations ( $P < 0.05$ ) are denoted in bold.

Abbreviation: *BC* breast cancer, *SD* standard deviation.

**eTable 2. Frequency of germline protein-truncating variants in the 34 BC genes**

| Gene name       | Number of BC patients with a PTV | Frequency (%) in dataset (SDC & IC tumors) | Frequency (%) among PTVs (SDC & IC tumors) |
|-----------------|----------------------------------|--------------------------------------------|--------------------------------------------|
| <i>CHEK2</i>    | 74                               | 1.80                                       | 23.49                                      |
| <i>FANCM</i>    | 53                               | 1.29                                       | 16.83                                      |
| <i>BRCA2</i>    | 42                               | 1.02                                       | 13.33                                      |
| <i>ATM</i>      | 27                               | 0.66                                       | 8.57                                       |
| <i>RAD50</i>    | 15                               | 0.36                                       | 4.76                                       |
| <i>PALB2</i>    | 14                               | 0.34                                       | 4.44                                       |
| <i>BRCA1</i>    | 12                               | 0.29                                       | 3.81                                       |
| <i>BARD1</i>    | 10                               | 0.24                                       | 3.17                                       |
| <i>NBN</i>      | 8                                | 0.19                                       | 2.54                                       |
| <i>RAD51C</i>   | 8                                | 0.19                                       | 2.54                                       |
| <i>BRIP1</i>    | 7                                | 0.17                                       | 2.22                                       |
| <i>ABRAXAS1</i> | 7                                | 0.17                                       | 2.22                                       |
| <i>RECQL</i>    | 7                                | 0.17                                       | 2.22                                       |
| <i>FANCC</i>    | 5                                | 0.12                                       | 1.59                                       |
| <i>MUTYH</i>    | 5                                | 0.12                                       | 1.59                                       |
| <i>MRE11</i>    | 4                                | 0.10                                       | 1.27                                       |
| <i>STK11</i>    | 3                                | 0.07                                       | 0.95                                       |
| <i>BABAM2</i>   | 2                                | 0.05                                       | 0.63                                       |
| <i>GEN1</i>     | 2                                | 0.05                                       | 0.63                                       |
| <i>NF1</i>      | 2                                | 0.05                                       | 0.63                                       |
| <i>RINT1</i>    | 2                                | 0.05                                       | 0.63                                       |
| <i>AKT1</i>     | 1                                | 0.02                                       | 0.32                                       |
| <i>EPCAM</i>    | 1                                | 0.02                                       | 0.32                                       |
| <i>MSH6</i>     | 1                                | 0.02                                       | 0.32                                       |
| <i>PIK3CA</i>   | 1                                | 0.02                                       | 0.32                                       |
| <i>PTEN</i>     | 1                                | 0.02                                       | 0.32                                       |
| <i>XRCC2</i>    | 1                                | 0.02                                       | 0.32                                       |
| <i>CDH1</i>     | 0                                | 0.00                                       | 0.00                                       |
| <i>MEN1</i>     | 0                                | 0.00                                       | 0.00                                       |
| <i>MLH1</i>     | 0                                | 0.00                                       | 0.00                                       |
| <i>MSH2</i>     | 0                                | 0.00                                       | 0.00                                       |
| <i>PMS2</i>     | 0                                | 0.00                                       | 0.00                                       |
| <i>RAD51D</i>   | 0                                | 0.00                                       | 0.00                                       |
| <i>TP53</i>     | 0                                | 0.00                                       | 0.00                                       |

List of the 34 BC susceptibility genes, the frequency of PTVs in the dataset (2,892 SDC and 1,229 IC), and the relative frequency among the total number of PTVs in the dataset.

Abbreviation: *BC* breast cancer, *IC* interval breast cancer, *PTVs* protein-truncating variants, *SDC* screen-detected breast cancer.

**eTable 3. Association of protein-truncating variants in the 5 major genes with interval cancer among women without strong family history of BC**

| Protein-Truncating Variants (PTVs) | All BC patients<br>Adj. for age at diagnosis,<br>study cohort, and PD<br>N = 4,005 |           |                           | 'True' IC subset<br>Adj. for age at diagnosis<br>and study cohort<br>N = 3,277 |           |                           |
|------------------------------------|------------------------------------------------------------------------------------|-----------|---------------------------|--------------------------------------------------------------------------------|-----------|---------------------------|
|                                    | SDC<br>(N)                                                                         | IC<br>(N) | IC vs. SDC<br>OR (95% CI) | SDC<br>(N)                                                                     | IC<br>(N) | IC vs. SDC<br>OR (95% CI) |
| Full panel (34 PTVs)               |                                                                                    |           |                           |                                                                                |           |                           |
| Non-Carriers                       | 2,609                                                                              | 1,105     | 1.00 (Referent)           | 2,609                                                                          | 424       | 1.00 (Referent)           |
| Carriers                           | 197                                                                                | 94        | 1.16 (0.89–1.50)          | 197                                                                            | 47        | <b>1.50 (1.07–2.10)</b>   |
| All PTVs excl. 5 major genes       |                                                                                    |           |                           |                                                                                |           |                           |
| Non-Carriers                       | 2,609                                                                              | 1,105     | 1.00 (Referent)           | 2,609                                                                          | 424       | 1.00 (Referent)           |
| Carriers                           | 98                                                                                 | 33        | 0.82 (0.54–1.23)          | 98                                                                             | 18        | 1.10 (0.66–1.85)          |
| 5 major genes for BC               |                                                                                    |           |                           |                                                                                |           |                           |
| Non-Carriers                       | 2,387                                                                              | 1,138     | 1.00 (Referent)           | 2,387                                                                          | 442       | 1.00 (Referent)           |
| Carriers                           | 99                                                                                 | 61        | <b>1.50 (1.07–2.10)</b>   | 99                                                                             | 29        | <b>1.91 (1.25–2.94)</b>   |
| <i>BRCA1/2 + PALB2</i>             |                                                                                    |           |                           |                                                                                |           |                           |
| Non-Carriers                       | 2,387                                                                              | 1,138     | 1.00 (Referent)           | 2,387                                                                          | 442       | 1.00 (Referent)           |
| Carriers                           | 34                                                                                 | 29        | <b>1.95 (1.16–3.26)</b>   | 34                                                                             | 14        | <b>2.58 (1.36–4.87)</b>   |
| <i>ATM + CHEK2</i>                 |                                                                                    |           |                           |                                                                                |           |                           |
| Non-Carriers                       | 2,387                                                                              | 1,138     | 1.00 (Referent)           | 2,387                                                                          | 442       | 1.00 (Referent)           |
| Carriers                           | 65                                                                                 | 33        | 1.28 (0.82–1.98)          | 65                                                                             | 15        | 1.54 (0.87–2.74)          |

We included BC patients diagnosed with SDC (=2,806) and IC (=1,199), after excluding 72 BC patients with strong family history of BC, and 44 BC patients with missing information. The left model included all BC patients attending to mammographic screening (SDC and IC), adjusted by age at diagnosis, study cohort and PD; In the right model "True IC subset", IC patients (but not SDC patients) with medium or high mammographic density (PD > 25) were excluded. Of note, the corresponding ORs for BRCA1/2 (without PALB2) were 2.03 (1.14–3.60) and 2.34 (1.11–4.91) for the entire dataset and 'true' IC subset, respectively (data not shown in tables). NOTE: Significant associations ( $P < 0.05$ ) are denoted in bold.

Abbreviation: BC breast cancer, CI confidence interval, IC interval breast cancer, OR odds ratio, PD percent density SDC screen-detected breast cancer.

**eTable 4. Tumor characteristics of BC patients, stratified by mode of detection**

| Tumor characteristics     | No. of patients diagnosed with SDC (%) | No. of patients diagnosed with IC (%) | Chi-square test P value |
|---------------------------|----------------------------------------|---------------------------------------|-------------------------|
| Year of diagnosis         |                                        |                                       | 0.69                    |
| 2001–2004                 | 705 (28.44%)                           | 339 (29.37%)                          |                         |
| 2005–2008                 | 1,110 (44.78%)                         | 497 (43.07%)                          |                         |
| 2009–2012                 | 472 (19.04%)                           | 219 (18.98%)                          |                         |
| 2013–2016                 | 192 (7.74%)                            | 99 (8.58%)                            |                         |
| Missing (0%)              |                                        |                                       |                         |
| Age at diagnosis          |                                        |                                       | <b>&lt;0.001</b>        |
| <50                       | 151 (6.09%)                            | 115 (9.96%)                           |                         |
| 50–59                     | 894 (36.06%)                           | 473 (40.99%)                          |                         |
| ≥60                       | 1,434 (57.85%)                         | 566 (49.05%)                          |                         |
| Missing (0%)              |                                        |                                       |                         |
| ER status                 |                                        |                                       | <b>&lt;0.001</b>        |
| Positive                  | 2,135 (90.62%)                         | 875 (80.20%)                          |                         |
| Negative                  | 221 (9.38%)                            | 216 (19.80%)                          |                         |
| Missing (5.12%)           |                                        |                                       |                         |
| PR status                 |                                        |                                       | <b>&lt;0.001</b>        |
| Positive                  | 1,772 (75.66%)                         | 689 (63.97%)                          |                         |
| Negative                  | 570 (24.34%)                           | 388 (36.03%)                          |                         |
| Missing (5.89%)           |                                        |                                       |                         |
| HER2 status               |                                        |                                       | <b>&lt;0.001</b>        |
| Positive                  | 128 (10.47%)                           | 107 (18.32%)                          |                         |
| Negative                  | 1,095 (89.53%)                         | 477 (81.68%)                          |                         |
| Missing (6.55%)           |                                        |                                       |                         |
| Tumor size (mm)           |                                        |                                       | <b>&lt;0.001</b>        |
| <20                       | 1,771 (81.02%)                         | 640 (63.05%)                          |                         |
| ≥20                       | 415 (18.98%)                           | 375 (36.95%)                          |                         |
| Missing (11.89%)          |                                        |                                       |                         |
| Lymph node involvement    |                                        |                                       | <b>&lt;0.001</b>        |
| No                        | 2,183 (93.41%)                         | 906 (85.07%)                          |                         |
| Yes                       | 154 (6.59%)                            | 159 (14.93%)                          |                         |
| Missing (6.36%)           |                                        |                                       |                         |
| Grade                     |                                        |                                       | <b>&lt;0.001</b>        |
| Well-differentiated       | 514 (26.62%)                           | 133 (15.57%)                          |                         |
| Moderately differentiated | 973 (50.39%)                           | 393 (46.02%)                          |                         |
| Poorly differentiated     | 444 (22.99%)                           | 328 (38.41%)                          |                         |
| Missing (4.39%)           |                                        |                                       |                         |

Tumor characteristics of the 3,633 BC patients attending to mammographic screening, after exclusion of in situ cancers (N=488). Patients were stratified by mode of detection (SDC or IC). Statistical differences between BC subtypes were calculated using the chi-square test. Missing values were excluded for calculating the proportions. HER2 status and grade were available in the registry for BC patients diagnosed from 2007 and 2004 onwards, respectively. NOTE: Significant associations ( $P < 0.05$ ) are denoted in bold. Abbreviation: *BC* breast cancer, *IC* interval breast cancer, *ER* estrogen receptor, *PR* progesterone receptor, *SDC* screen-detected breast cancer.

**eTable 5. Association of protein-truncating variants in the 5 major genes with interval cancer**

| Protein-Truncating Variants in the 5 major genes for BC | All BC patients<br>Adj. for age at diagnosis,<br>study cohort, and PD<br><i>n</i> = 4,121 |                    |                           | 'True' IC subset<br>Adj. for age at diagnosis<br>and study cohort<br><i>n</i> = 3,377 |                    |                           |
|---------------------------------------------------------|-------------------------------------------------------------------------------------------|--------------------|---------------------------|---------------------------------------------------------------------------------------|--------------------|---------------------------|
|                                                         | SDC<br>( <i>n</i> )                                                                       | IC<br>( <i>n</i> ) | IC vs. SDC<br>OR (95% CI) | SDC<br>( <i>n</i> )                                                                   | IC<br>( <i>n</i> ) | IC vs. SDC<br>OR (95% CI) |
| <i>CHEK2</i>                                            |                                                                                           |                    |                           |                                                                                       |                    |                           |
| Non-Carriers                                            | 2,787                                                                                     | 1,166              | 1.00 (Referent)           | 2,787                                                                                 | 455                | 1.00 (Referent)           |
| Carriers                                                | 49                                                                                        | 25                 | 1.20 (0.73–1.99)          | 49                                                                                    | 10                 | 1.34 (0.67–2.68)          |
| <i>BRCA2</i>                                            |                                                                                           |                    |                           |                                                                                       |                    |                           |
| Non-Carriers                                            | 2,787                                                                                     | 1,166              | 1.00 (Referent)           | 2,787                                                                                 | 455                | 1.00 (Referent)           |
| Carriers                                                | 23                                                                                        | 19                 | 1.77 (0.95–3.32)          | 23                                                                                    | 9                  | <b>2.40 (1.10–5.27)</b>   |
| <i>ATM</i>                                              |                                                                                           |                    |                           |                                                                                       |                    |                           |
| Non-Carriers                                            | 2,787                                                                                     | 1,166              | 1.00 (Referent)           | 2,787                                                                                 | 455                | 1.00 (Referent)           |
| Carriers                                                | 19                                                                                        | 8                  | 1.37 (0.58–3.23)          | 19                                                                                    | 5                  | 1.84 (0.68–4.99)          |
| <i>PALB2</i>                                            |                                                                                           |                    |                           |                                                                                       |                    |                           |
| Non-Carriers                                            | 2,787                                                                                     | 1,166              | 1.00 (Referent)           | 2,787                                                                                 | 455                | 1.00 (Referent)           |
| Carriers                                                | 8                                                                                         | 6                  | 1.99 (0.67–5.95)          | 8                                                                                     | 5                  | <b>4.27 (1.37–13.32)</b>  |
| <i>BRCA1</i>                                            |                                                                                           |                    |                           |                                                                                       |                    |                           |
| Non-Carriers                                            | 2,787                                                                                     | 1,166              | 1.00 (Referent)           | 2,787                                                                                 | 455                | 1.00 (Referent)           |
| Carriers                                                | 6                                                                                         | 6                  | 2.42 (0.74–7.86)          | 6                                                                                     | 1                  | 0.99 (0.12–8.25)          |

We included BC patients diagnosed with SDC (=2,892) and IC (=1,229). The left model included all BC patients attending to mammographic screening (SDC and IC), adjusted by age at diagnosis, study cohort and PD; In the right model "True IC subset", IC patients (but not SDC patients) with medium or high mammographic density (PD > 25) were excluded. NOTE: Significant associations ( $P < 0.05$ ) are denoted in bold.

Abbreviation: *BC* breast cancer, *CI* confidence interval, *IC* interval breast cancer, *OR* odds ratio, *PD* percent density *SDC* screen-detected breast cancer.

## Supplementary Figures

eFigure 1. CONSORT flow diagram

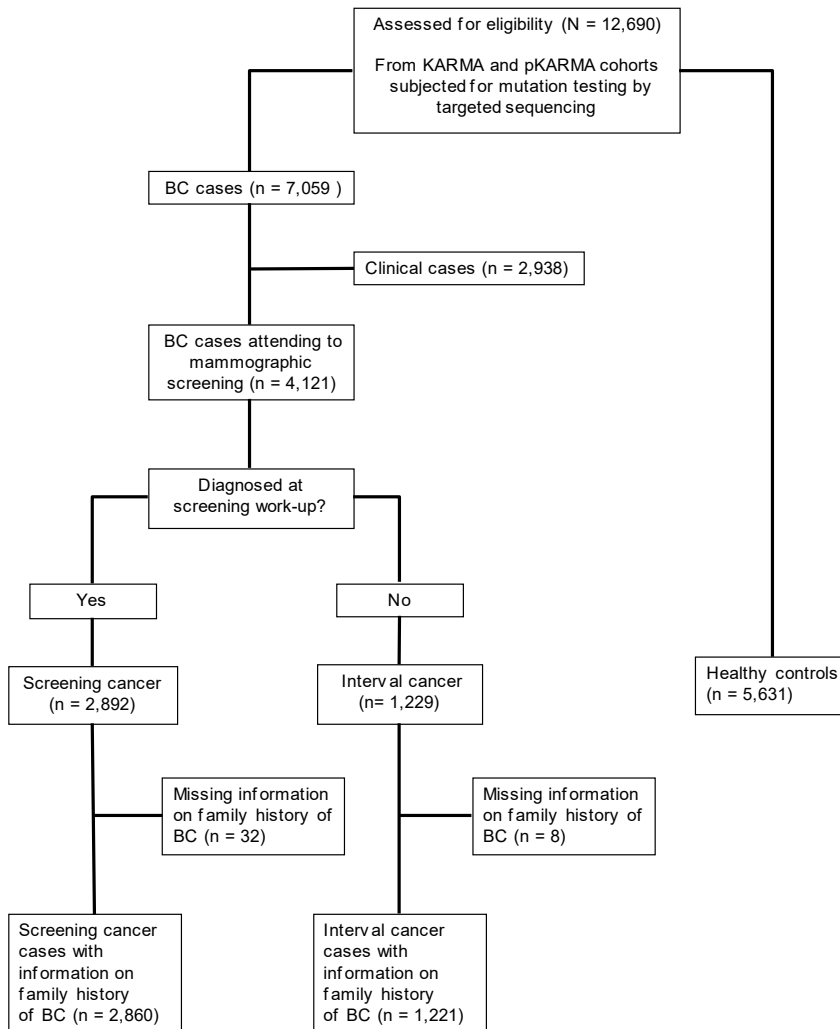

Flow chart of study creation, describing the initial cohort available for analysis and exclusions made. Only participants who were subjected for mutation testing using targeted sequencing and passed quality control were included. All BC cases from pKARMA, and all BC cases from KARMA diagnosed from 2005 to 2016 were included in the current study, together with age-matched controls. The first occurrence of BC was counted as the date of diagnosis. Clinical cancer cases ( $N = 2,938$ ) were excluded from the analyses as our main interest was interval and screening detected cancers. 40 BC patients had missing information in both questionnaires and in The Swedish Multi-Generation Register, and that information was considered as missing (0.97% of the dataset).

Abbreviation: BC breast cancer.

**eFigure 2. Frequency of Protein-Truncating Variants among BC patients**

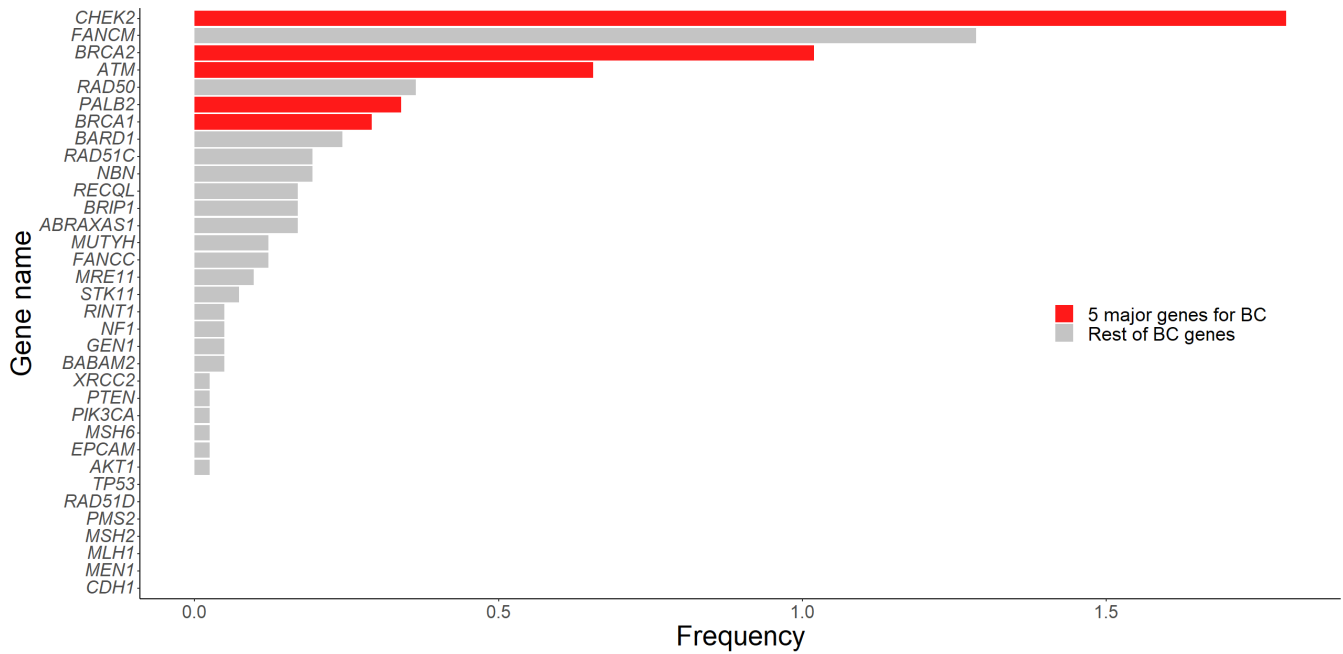

Frequency of PTVs in 34 susceptibility genes among 4,121 BC patients. PTVs were found in 96 (7,8%) patients with IC, and in 206 (7.1%) patients diagnosed with SDC. The genes are listed in order of decreasing frequency for BC patients. Red bars represent PTVs in the 5 major genes for BC, while grey bars represent PTVs in the 29 remaining genes. No PTV was found in *TP53*, *RAD51D*, *PMS2*, *MSH2*, *MLH1*, *MEN1*, and *CDH1* genes.

Abbreviation: *BC* breast cancer, *IC* interval breast cancer, *PTVs* protein-truncating variants, *SDC* screen-detected breast cancer.
