# Supplementary material for: Investigation of Genetic Alterations Associated With Interval Breast Cancer
Source: PubMed Central journal article supplement (PMC10811589; doi:10.1001/jamaoncol.2023.6287), 2024-01-25
Supplement: jamaoncol-e236287-s002.pdf [file jamaoncol-e236287-s002.pdf]

## Data Sharing Statement

### Data

**Data available:** Yes

**Data types:** Participant data with identifiers

**How to access data:** Access to phenotypes, biospecimens and genotypes from the KARMA study can be requested from <https://karmastudy.org/data-access/>. Access to the pKARMA phenotypes and genotypes is restricted due to IRB requirements but data can be shared upon reasonable request to the principal investigator of pKARMA ([Kamila.Czene@ki.se](mailto:Kamila.Czene@ki.se))

**When available:** With publication

### Supporting Documents

**Document types:** Statistical/analytic code

**How to access documents:** [juan.rodriguez@ki.se](mailto:juan.rodriguez@ki.se)

**When available:** With publication

### Additional Information

**Who can access the data:** Researchers whose proposed use of the data has been approved

**Types of analyses:** Any purpose

**Mechanisms of data availability:** After approval of a proposal
